# Supplementary material for: Recovering Quality of Life (ReQoL): a new generic self-reported outcome measure for use with people experiencing mental health difficulties
Source: PubMed Central journal article supplement (PMC6457165; doi:10.1192/bjp.2017.10), 2018-01
Supplement: S0007125017000101sup001.pdf [file S0007125017000101sup001.pdf]

**Table DS1 List of criteria used in Stage I of the development process, adapted from Streiner et al.<sup>1</sup>**

|    |                               |                                                                                                                                                                                                    |
|----|-------------------------------|----------------------------------------------------------------------------------------------------------------------------------------------------------------------------------------------------|
| 1. | Reading Level                 | Rule of thumb: reading skills should not exceed those of a 12 year old                                                                                                                             |
| 2. | Ambiguity                     | Poorly worded items<br>Even straightforward items may pose a problem if not applicable, e.g. I like my spouse<br>is problematic if someone does not a spouse                                       |
| 3. | Double –barrelled question    | This is where two or more questions are asked at the same time and the answers for each may be different. This may also be where two different concepts are compounded e.g. anxiety and depression |
| 4. | Jargon                        | The vocabulary should not be technical and should be part of everyday vocabulary.                                                                                                                  |
| 5. | Value-laden words             | Judgmental statements may prejudice the respondent and should therefore be avoided (e.g. having more social contact may not be seen to be better by everyone)                                      |
| 6. | Positive and negative wording | Negatively worded items should be avoided e.g. it is better to have the item 'I feel ill most of the time' compared with 'I rarely feel well'                                                      |
| 7. | Length of items               | Should be as short as possible but not too short that it loses comprehensibility                                                                                                                   |

In addition to the above criteria, the ReQoL research team used the following:

|     |                                            |                                                                                                        |
|-----|--------------------------------------------|--------------------------------------------------------------------------------------------------------|
| 8.  | Too specific to a lifestyle or a diagnosis | e.g. referring to employment when many respondents may not work<br>e.g. hearing voices is too specific |
| 9.  | Makes comparisons over time                | e.g. the phrase 'compared to usual' in an item                                                         |
| 10. | Does not lend itself to change over time   | e.g. character traits of people or circumstances that NHS services cannot change                       |

---

<sup>1</sup>Streiner, David L., and Geoffrey R. Norman. *Health measurement scales: a practical guide to their development and use*. Oxford Medical Publications, 1989.

**Figure DS1 Stage I Generation of candidate items: Item reduction flow chart**

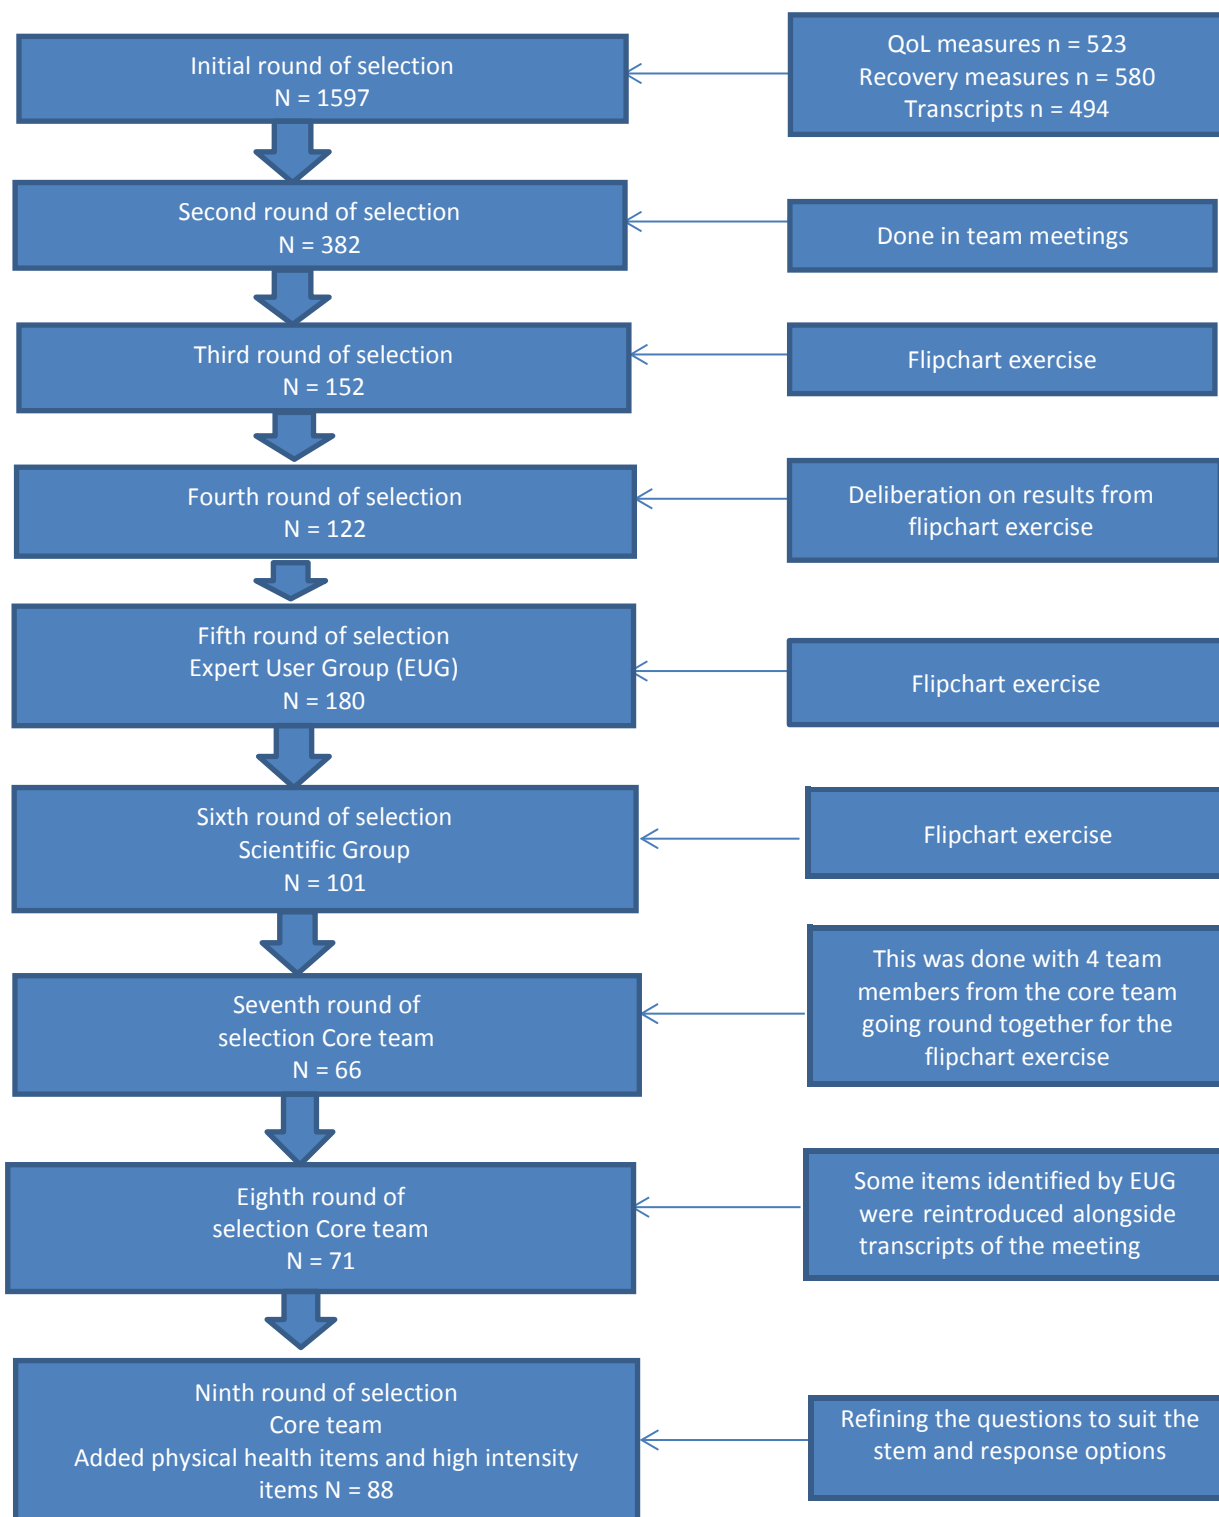

The initial selection of items was done by two researchers from the core team. The second, third and fourth rounds of selection were performed by the core team in a series of meetings. During the 'flipchart exercise', items were written on post-it notes on flipcharts grouped by themes and sub-themes. Members went round the room either alone or in small groups and put a sticker next to their preferred items. Votes for each item were counted and were used to inform item selection.

**Table DS2 Missing data of the 40-item set by item under each theme**

| Theme                        | Item                                                    | Total sample n = 4266 |     |
|------------------------------|---------------------------------------------------------|-----------------------|-----|
| Activity                     | I found it difficult to get started with everyday tasks | 139                   | 3%  |
|                              | I did things I found rewarding                          | 166                   | 4%  |
|                              | I neglected myself                                      | 188                   | 4%  |
|                              | I avoided things I needed to do                         | 173                   | 4%  |
|                              | I enjoyed what I did                                    | 164                   | 4%  |
| Belonging and Relationships  | People around me caused me distress                     | 145                   | 3%  |
|                              | I felt lonely                                           | 161                   | 4%  |
|                              | I felt able to trust others                             | 171                   | 4%  |
|                              | I felt people did not want to be around me              | 166                   | 4%  |
|                              | I thought people cared about me                         | 169                   | 4%  |
| Choice, Control and Autonomy | I could do the things I wanted to do                    | 161                   | 4%  |
|                              | I felt overwhelmed by my problems                       | 166                   | 4%  |
|                              | I had the opportunity to do the things I wanted         | 151                   | 4%  |
|                              | I felt unable to cope                                   | 175                   | 4%  |
|                              | I felt in control of my life                            | 180                   | 4%  |
| Hope                         | I felt hopeful about my future                          | 181                   | 4%  |
|                              | I felt hopeless                                         | 162                   | 4%  |
|                              | Everything in my life felt bad                          | 162                   | 4%  |
|                              | I thought my life was not worth living                  | 152                   | 4%  |
| Self-perception              | I felt like a failure                                   | 157                   | 4%  |
|                              | I felt confident in myself                              | 163                   | 4%  |
|                              | I felt at ease with who I am                            | 162                   | 4%  |
|                              | I valued myself as a person                             | 140                   | 3%  |
|                              | I disliked myself                                       | 182                   | 4%  |
| Wellbeing                    | I felt calm                                             | 137                   | 3%  |
|                              | I felt miserable                                        | 143                   | 3%  |
|                              | I felt safe                                             | 150                   | 4%  |
|                              | I was disturbed by unwanted thoughts and feelings       | 155                   | 4%  |
|                              | I felt irritated                                        | 165                   | 4%  |
|                              | I felt angry                                            | 154                   | 4%  |
|                              | I felt relaxed                                          | 177                   | 4%  |
|                              | I felt terrified                                        | 179                   | 4%  |
|                              | I felt everything was an effort                         | 166                   | 4%  |
|                              | I felt panic                                            | 159                   | 4%  |
|                              | I felt happy                                            | 174                   | 4%  |
|                              | I found it hard to concentrate                          | 159                   | 4%  |
|                              | I worried too much                                      | 161                   | 4%  |
|                              | I felt anxious                                          | 181                   | 4%  |
|                              | I had problems with my sleep                            | 149                   | 3%  |
| Physical health              |                                                         | 299                   | 7%§ |

§This was higher than the rest due to the presentation of the question in the survey booklet.

**Table DS3 Endorsement frequency (Study 2: n = 4266)**

| Item description                                        | Levels |       |       |     |       |
|---------------------------------------------------------|--------|-------|-------|-----|-------|
|                                                         | 1      | 2     | 3     | 4   | 5     |
| I found it difficult to get started with everyday tasks | 589    | 853   | 1051  | 889 | 745   |
|                                                         | 14%    | 21%   | 25%   | 22% | 18%   |
| I felt able to trust others                             | 466    | 822   | 991   | 893 | 923   |
|                                                         | 11%    | 20%   | 24%   | 22% | 23%   |
| I felt unable to cope                                   | 481    | 655   | 850   | 825 | 1,280 |
|                                                         | 12%    | 16%   | 21%   | 20% | 31%   |
| I could do the things I wanted to do                    | 410    | 988   | 1,168 | 703 | 836   |
|                                                         | 10%    | 24%   | 28%   | 17% | 20%   |
| I felt happy                                            | 583    | 1,020 | 1,110 | 751 | 628   |
|                                                         | 14%    | 25%   | 27%   | 18% | 15%   |
| I thought my life was not worth living                  | 381    | 446   | 573   | 610 | 2,104 |
|                                                         | 9%     | 11%   | 14%   | 15% | 51%   |
| I enjoyed what I did                                    | 452    | 834   | 1,234 | 752 | 830   |
|                                                         | 11%    | 20%   | 30%   | 18% | 20%   |
| I felt hopeful about my future                          | 713    | 948   | 1,029 | 668 | 727   |
|                                                         | 17%    | 23%   | 25%   | 16% | 18%   |
| I felt lonely                                           | 623    | 699   | 807   | 777 | 1,199 |
|                                                         | 15%    | 17%   | 20%   | 19% | 29%   |
| I felt confident in myself                              | 826    | 974   | 982   | 617 | 704   |
|                                                         | 20%    | 24%   | 24%   | 15% | 17%   |
| I did things I found rewarding                          | 576    | 962   | 1198  | 781 | 583   |
|                                                         | 14%    | 23%   | 29%   | 19% | 14%   |
| I avoided things I needed to do                         | 566    | 810   | 984   | 834 | 899   |
|                                                         | 14%    | 20%   | 24%   | 20% | 22%   |
| I felt irritated                                        | 483    | 895   | 1,080 | 983 | 660   |
|                                                         | 12%    | 22%   | 26%   | 24% | 16%   |
| I felt like a failure                                   | 686    | 649   | 717   | 709 | 1,348 |
|                                                         | 17%    | 16%   | 17%   | 17% | 33%   |
| I felt in control of my life                            | 803    | 957   | 903   | 642 | 781   |
|                                                         | 20%    | 23%   | 22%   | 16% | 19%   |
| I felt terrified                                        | 241    | 377   | 630   | 655 | 2,171 |
|                                                         | 6%     | 9%    | 15%   | 16% | 53%   |
| I felt anxious                                          | 868    | 914   | 824   | 801 | 678   |
|                                                         | 21%    | 22%   | 20%   | 20% | 17%   |
| I had problems with my sleep                            | 1,080  | 766   | 715   | 716 | 840   |
|                                                         | 26%    | 19%   | 17%   | 17% | 20%   |
| I felt calm                                             | 381    | 964   | 1,256 | 792 | 736   |
|                                                         | 9%     | 23%   | 30%   | 19% | 18%   |
| I found it hard to concentrate                          | 778    | 877   | 965   | 842 | 645   |
|                                                         | 19%    | 21%   | 24%   | 21% | 16%   |

**Table DS4: Characteristics of the online samples for reliability**

|                         |                                  | Patients (n = 800) |      | General population (n = 2000) |      |
|-------------------------|----------------------------------|--------------------|------|-------------------------------|------|
|                         |                                  | Mean               | SD % | Mean N                        | SD % |
| Age groups in years     | 18 to 24                         | 25                 | 3.1  | 223                           | 11.2 |
|                         | 25 to 34                         | 108                | 13.6 | 343                           | 17.5 |
|                         | 35 to 44                         | 147                | 18.4 | 334                           | 16.7 |
|                         | 45 to 54                         | 234                | 29.2 | 371                           | 18.6 |
|                         | 55 to 64                         | 273                | 34.1 | 296                           | 14.8 |
|                         | 65 and over                      | 13                 | 1.6  | 433                           | 21.7 |
| Life satisfaction score | Score 0 to 10 (10 highest)       | 4.6                | 2.4  | 6.7                           | 2.2  |
| Gender                  | Male                             | 311                | 38.9 | 927                           | 46.4 |
|                         | Female                           | 489                | 61.1 | 1073                          | 53.6 |
| Marital Status          | Single                           | 259                | 32.4 | 560                           | 28.0 |
|                         | Married / Partner                | 398                | 49.8 | 1203                          | 60.2 |
|                         | Separated / Divorced             | 118                | 14.7 | 160                           | 8.0  |
|                         | Widowed                          | 23                 | 2.9  | 72                            | 3.6  |
|                         | Prefer not to say                | 2                  | 0.2  | 5                             | 0.2  |
| Ethnicity               | White                            | 777                | 97.1 | 1833                          | 91.7 |
|                         | Non white                        | 23                 | 2.9  |                               |      |
| Degree                  | Yes                              | 313                | 39.1 | 996                           | 49.8 |
|                         | No                               | 487                | 60.9 | 1004                          | 50.2 |
| Main activity           | In employment or self-employment | 332                | 41.5 | 1063                          | 53.2 |
|                         | Retired                          | 86                 | 10.7 | 507                           | 23.3 |
|                         | Housework                        | 95                 | 11.9 | 162                           | 8.1  |
|                         | Student                          | 19                 | 2.4  | 101                           | 5.1  |
|                         | Unemployed                       | 268                | 33.5 | 167                           | 8.3  |
| General physical health | Excellent                        | 25                 | 3.1  | 246                           | 12.3 |
|                         | Good                             | 210                | 26.2 | 965                           | 48.2 |
|                         | Fair                             | 303                | 37.9 | 566                           | 28.3 |
|                         | Poor                             | 206                | 25.8 | 189                           | 9.5  |
|                         | Very poor                        | 56                 | 7.0  | 34                            | 1.7  |
| General mental health   | Excellent                        | 28                 | 3.5  | 628                           | 31.4 |
|                         | Good                             | 145                | 18.1 | 852                           | 42.6 |
|                         | Fair                             | 357                | 44.6 | 407                           | 20.3 |
|                         | Poor                             | 212                | 26.5 | 96                            | 4.8  |
|                         | Very poor                        | 58                 | 7.2  | 17                            | 0.9  |

**Table DS5 Distribution of scores – ReQoL and other measures**

|                           | <b>n</b> | <b>mean</b> | <b>standard deviation</b> | <b>completion rate %</b> |
|---------------------------|----------|-------------|---------------------------|--------------------------|
| ReQoL -10                 |          |             |                           |                          |
| Baseline                  | 4037     | 21.99       | 10.26                     | 95                       |
| Follow-up                 | 953      | 24.18       | 10.08                     |                          |
| ReQoL -20 (scale 0 to 80) |          |             |                           | 95                       |
| Baseline                  | 4037     | 43.27       | 19.93                     |                          |
| Follow-up                 | 953      | 48.56       | 19.57                     |                          |
| ReQoL -20 (scale 0 to 40) |          |             |                           | 95                       |
| Baseline                  | 4037     | 21.63       | 9.97                      |                          |
| Follow-up                 | 953      | 24.28       | 9.78                      |                          |
| SWEMWBS total             |          |             |                           |                          |
| Baseline                  | 1103     | 23.14       | 6.80                      | 95                       |
| Follow-up                 |          | 24.35       | 6.43                      |                          |
| SWEMWBS rasch             |          |             |                           |                          |
| Baseline                  | 1103     | 21.71       | 5.85                      | 95                       |
| Follow-up                 |          | 22.64       | 5.66                      |                          |
| EQ-5D                     |          |             |                           |                          |
| Baseline                  | 1592     | 0.75        | 0.25                      | 98                       |
| Follow-up                 |          | 0.78        | 0.22                      |                          |
| CORE-10                   |          |             |                           | 98                       |
| Baseline                  | 216      | 17.79       | 10.94                     |                          |
| Follow-up                 | 46       | 16.34       | 10.57                     |                          |
| PHQ-9                     |          |             |                           |                          |
| Baseline                  | 690      | 13.12       | 7.74                      | 89                       |
| Follow-up                 |          | 12.39       | 6.96                      |                          |
| GAD-7                     |          |             |                           |                          |
| Baseline                  | 554      | 6.24        | 5.18                      | 96                       |
| Follow-up                 |          | 12.08       | 7.44                      |                          |

Note: ReQoL -10 in its embedded form of 40 items

Figure DS2a: Distribution of ReQoL-10 scores at baseline

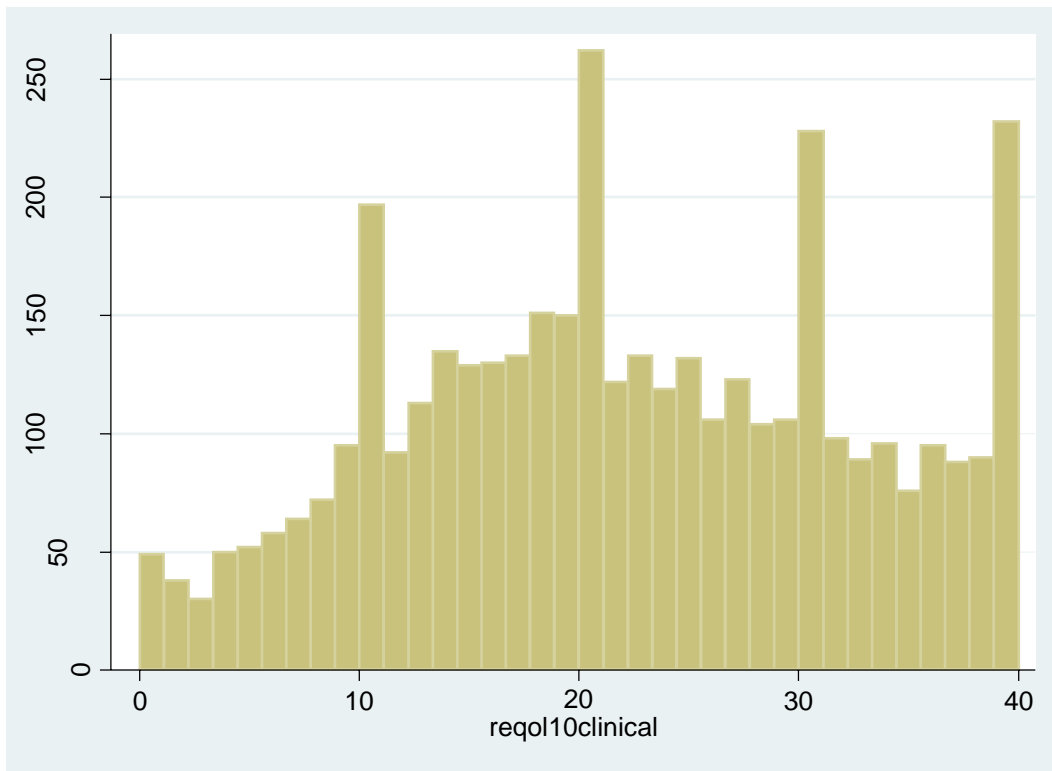

Figure DS2b: Distribution of ReQoL-20 scores at baseline on a scale 0 to 80

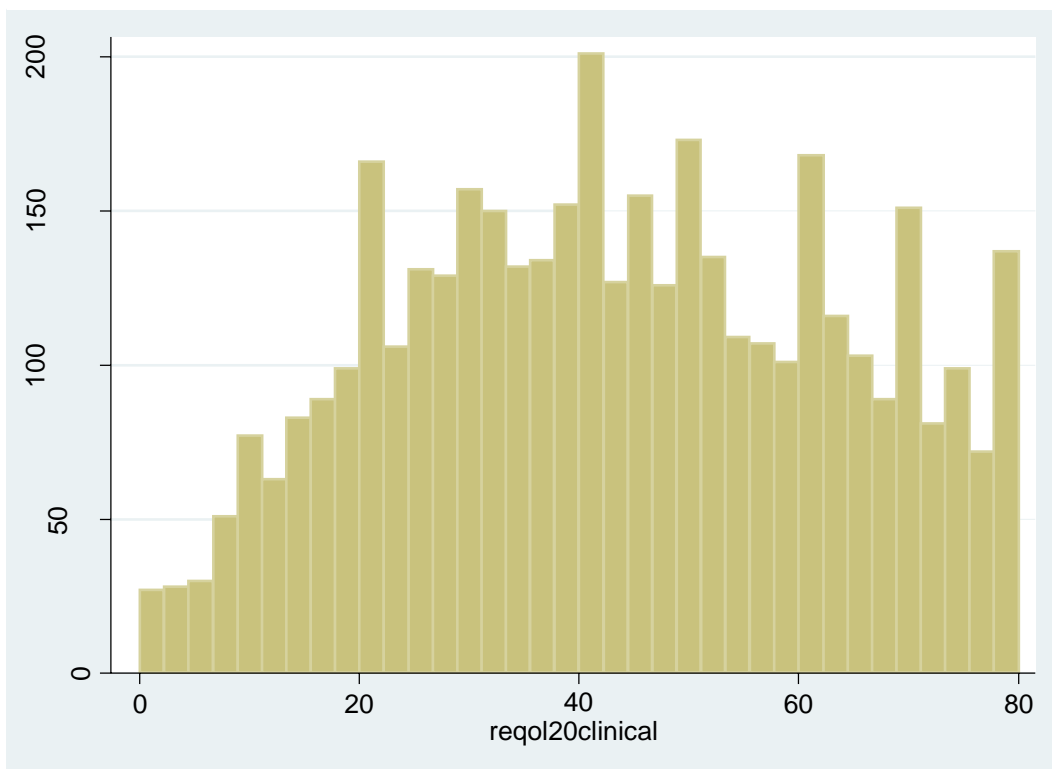

**Convergent validity: Lowess scatter plots between ReQoL-10 and the other measures**

**Figure DS3a: Lowess scatter plots between ReQoL-10 and ReQoL-20 (scale 0 to 40) at baseline**

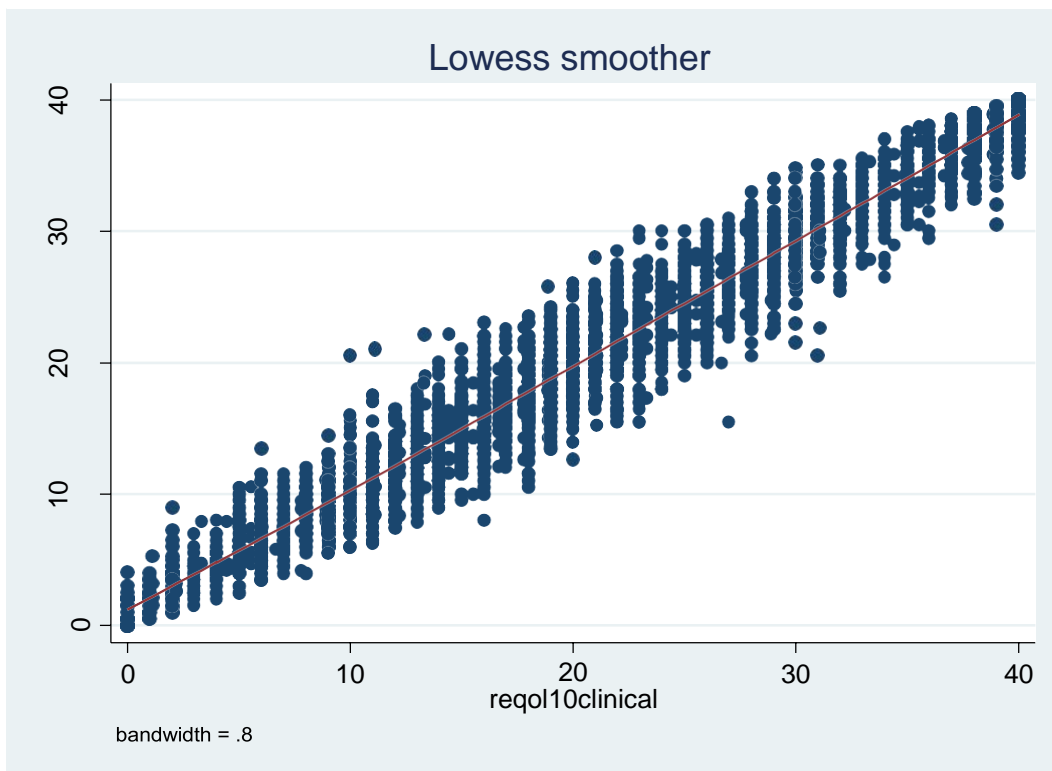

**Figure DS3b: Lowess scatter plots between ReQoL-10 and SWEMWBS total score at baseline**

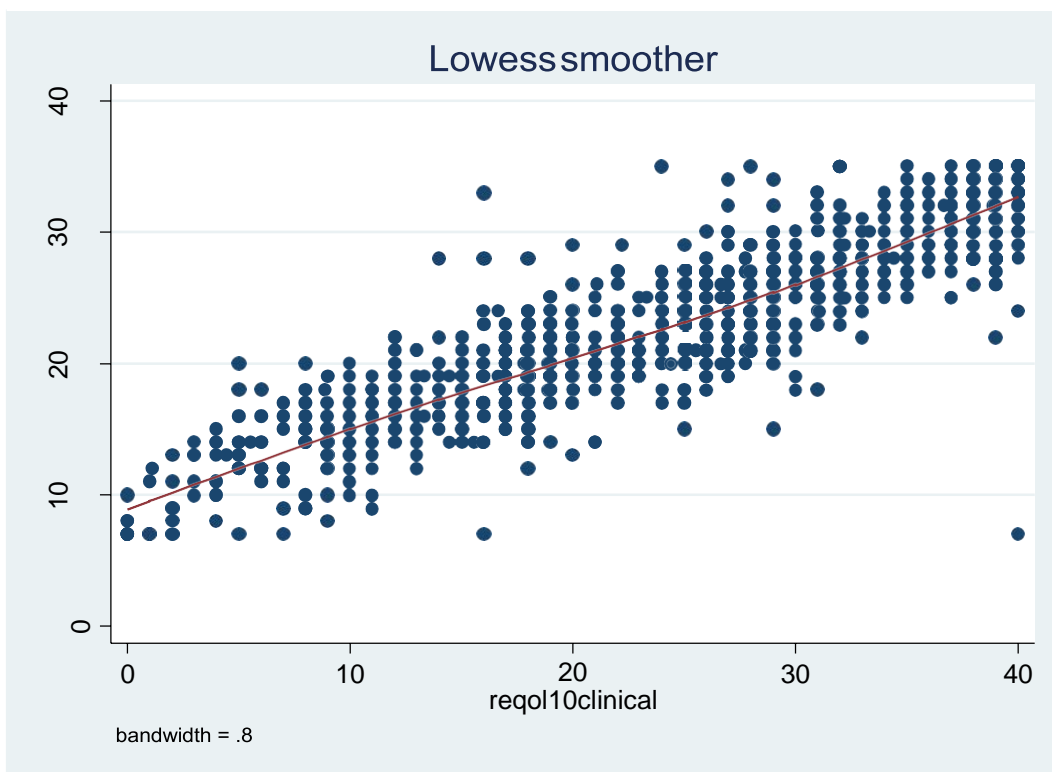



Figure DS3c: Lowess scatter plots between ReQoL-10 and SWEMWBS Rasch score at baseline

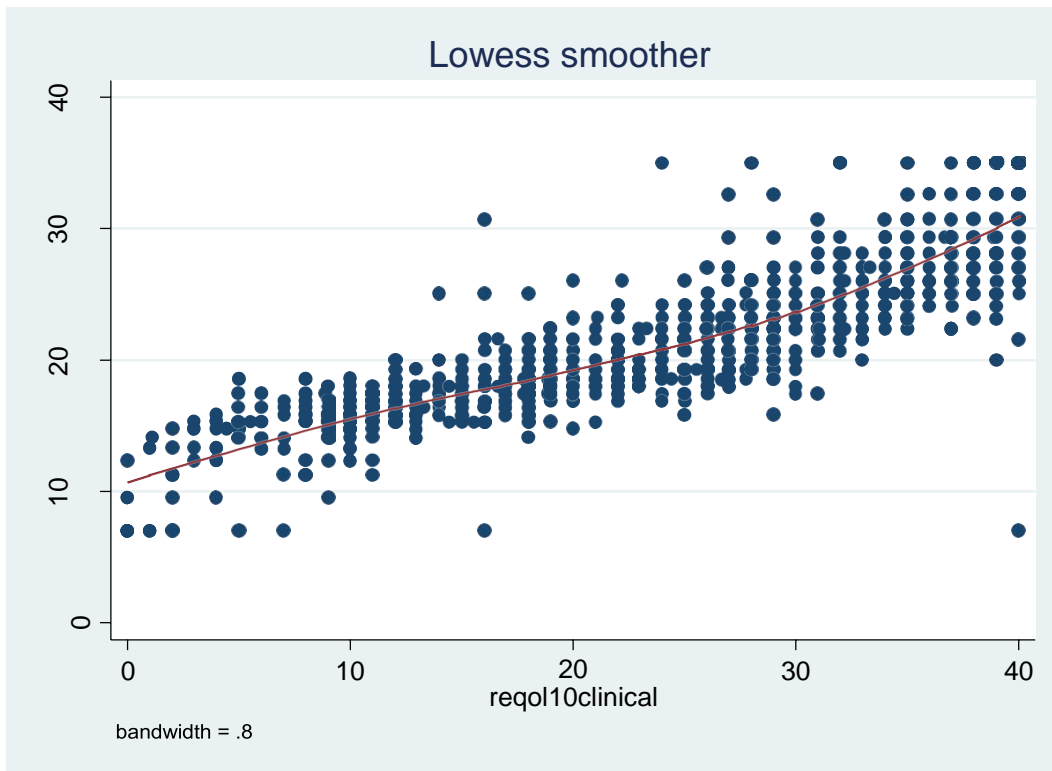

Figure DS3d: Lowess scatter plots between ReQoL-10 and CORE-10 at baseline

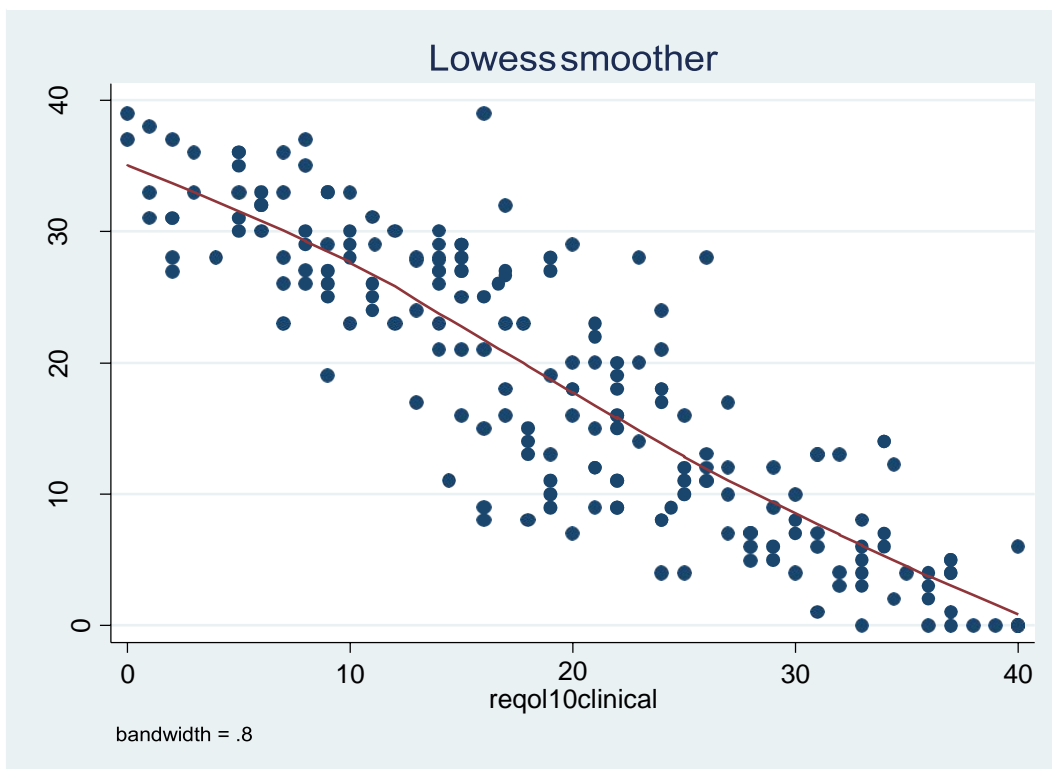

**Table DS6a: Known group validity: comparing ReQoL-10 and EQ-5D**

|                                                                                  | ReQoL-10 |               |         |      | EQ-5D |             |         |      |
|----------------------------------------------------------------------------------|----------|---------------|---------|------|-------|-------------|---------|------|
|                                                                                  | n        | mean(sd)      | p value | SES  | n     | mean(sd)    | p value | SES  |
| General population v patient population                                          | 1671     | 28.48 (6.96)  | <0.001  | 0.64 | 996   | 0.88 (0.21) | <0.001  | 0.59 |
|                                                                                  | 1513     | 24.02 (10.04) |         |      | 1513  | 0.75 (0.25) |         |      |
| <b>Comparing general population and the main disease areas</b>                   |          |               |         |      |       |             |         |      |
| Common mental health disorders                                                   | 530      | 22.10 (9.61)  | <0.001  | 0.92 | 530   | 0.73 (0.25) | <0.001  | 0.68 |
| Psychotic disorders                                                              | 190      | 24.61 (9.40)  | <0.001  | 0.56 | 190   | 0.78 (0.23) | <0.001  | 0.44 |
| Bipolar                                                                          | 97       | 23.13 (9.47)  | <0.001  | 0.77 | 97    | 0.74 (0.26) | <0.001  | 0.64 |
| Personality disorder                                                             | 59       | 15.71 (8.47)  | <0.001  | 1.83 | 59    | 0.63 (0.27) | <0.001  | 1.15 |
| Other MH disorders                                                               | 89       | 20.82 (9.96)  | <0.001  | 1.10 | 89    | 0.71 (0.26) | <0.001  | 0.78 |
| Using self-reported global assessment of health (Good versus Poor)               | 893      | 27.62 (8.90)  | <0.001  | 1.03 | 893   | 0.87 (0.13) | <0.001  | 2.31 |
|                                                                                  | 572      | 18.47 (9.12)  |         |      | 572   | 0.57 (0.27) |         |      |
| Using self-reported global assessment of <b>mental</b> health (Good versus Poor) | 1151     | 27.44 (8.12)  | <0.001  | 1.90 | 1151  | 0.82 (0.19) | <0.001  | 1.63 |
|                                                                                  | 321      | 12.00 (6.39)  |         |      | 321   | 0.51 (0.28) |         |      |

**Table DS6b: Known group validity: comparing ReQoL-10 and SWEMWBS transformed (rasch) score**

|                                                                                  | ReQoL-10 |               |      |         | SWEMWBS transformed |              |      |         |
|----------------------------------------------------------------------------------|----------|---------------|------|---------|---------------------|--------------|------|---------|
|                                                                                  | n        | mean(sd)      | SES  | p value | n                   | mean(sd)     | SES  | p value |
| General population v patient population                                          | 1671     | 28.48 (6.96)  | 0.56 | <0.001  | 7196                | 23.61 (3.9)  | 0.48 | <0.001  |
|                                                                                  | 1007     | 24.61 (10.62) |      |         | 1007                | 21.73 (5.86) |      |         |
| <b>Comparing general population and the main disease areas</b>                   |          |               |      |         |                     |              |      |         |
| Common mental health disorders                                                   | 371      | 23.38 (10.09) | 0.78 | <0.001  | 371                 | 20.73 (4.71) | 0.74 | <0.001  |
| Psychotic disorders                                                              | 52       | 23.20 (9.52)  | 0.76 | <0.001  | 52                  | 21.15 (5.59) | 0.63 | <0.001  |
| Bipolar                                                                          | 98       | 22.12 (10.31) | 0.91 | <0.001  | 98                  | 20.70 (5.83) | 0.75 | <0.001  |
| Personality disorder                                                             | 46       | 13.93 (8.41)  | 2.09 | <0.001  | 46                  | 16.45 (4.70) | 1.84 | <0.001  |
| Other disorders                                                                  | n low    |               |      |         |                     |              |      |         |
| Using self-reported global assessment of health (Good versus Poor)               | 583      | 28.55 (9.34)  | 1.07 | <0.001  | 583                 | 23.71 (5.67) | 0.90 | <0.001  |
|                                                                                  | 379      | 18.54 (9.44)  |      |         | 379                 | 18.62 (4.46) |      |         |
| Using self-reported global assessment of <b>mental</b> health (Good versus Poor) | 751      | 28.19 (8.60)  | 1.83 | <0.001  | 751                 | 23.38 (5.32) | 1.34 | <0.001  |
|                                                                                  | 205      | 12.42 (6.91)  |      |         | 205                 | 16.25 (3.48) |      |         |

**Table DS6c: Known group validity: comparing ReQoL-10 and SWEMWBS total (summative) score**

|                                                                                  | ReQoL-10 |               |      |         | SWEMWBS total |              |      |         |
|----------------------------------------------------------------------------------|----------|---------------|------|---------|---------------|--------------|------|---------|
|                                                                                  | n        | mean(sd)      | SES  | p value | n             | mean(sd)     | SES  | p value |
| General population v patient population                                          | 1671     | 28.48 (6.96)  | 0.56 | <0.001  | 7196          | 25.30 (4.72) | 0.43 | <0.001  |
|                                                                                  | 1007     | 24.61 (10.62) |      |         | 1007          | 23.25 (6.81) |      |         |
| Comparing general population and the main disease areas                          |          |               |      |         |               |              |      |         |
| Common mental health disorders                                                   | 371      | 23.38 (10.09) | 0.78 | <0.001  | 371           | 22.19 (5.89) | 0.66 | <0.001  |
| Psychotic disorders                                                              | 52       | 23.20 (9.52)  | 0.76 | <0.001  | 52            | 22.31 (6.51) | 0.63 | <0.001  |
| Bipolar                                                                          | 98       | 22.12 (10.31) | 0.91 | <0.001  | 98            | 21.74 (6.83) | 0.75 | <0.001  |
| Personality disorder                                                             | 46       | 13.93 (8.41)  | 2.09 | <0.001  | 46            | 16.4 (5.82)  | 1.89 | <0.001  |
| Other disorders                                                                  | n low    |               |      |         |               |              |      |         |
| Using self-reported global assessment of health (Good versus Poor)               | 583      | 28.55 (9.34)  | 1.07 | <0.001  | 583           | 25.56 (6.14) | 1.00 | <0.001  |
|                                                                                  | 379      | 18.54 (9.44)  |      |         | 379           | 19.44 (5.87) |      |         |
| Using self-reported global assessment of <b>mental</b> health (Good versus Poor) | 751      | 28.19 (8.60)  | 1.83 | <0.001  | 751           | 25.29 (5.74) | 1.62 | <0.001  |
|                                                                                  | 205      | 12.42 (6.91)  |      |         | 205           | 16.00 (4.60) |      |         |

All the correlation coefficients are significant at 1%

**Table DS7: Floor and ceiling effects at baseline and follow-up**

|                     | % at worst score |      | % best score |      |
|---------------------|------------------|------|--------------|------|
|                     | T1               | T2   | T1           | T2   |
| ReQoL-10            | 0.72             | 0.63 | 3.77         | 4.6  |
| ReQoL-20            | 0.30             | 0.32 | 1.49         | 1.9  |
| SWEMWBS Total score | 1.52             | 1.06 | 4.67         | 4.6  |
| SWEMWBS Rasch score | 1.52             | 1.06 | 4.67         | 4.6  |
| EQ-5D               | 0.00             | 0.00 | 14.04        | 15.7 |
